# Supplementary material for: Cost sensitive hierarchical document classification to triage PubMed abstracts for manual curation
Source: Springer Nature journal article supplement (doi:10.1186/1471-2105-12-482), 2011-12-01

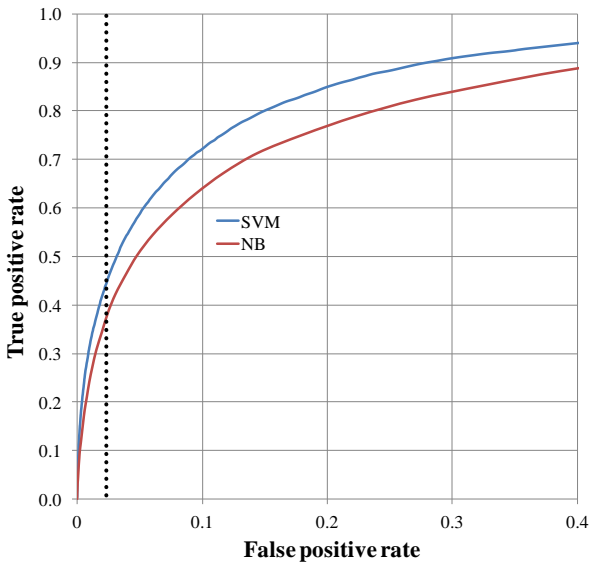

Supplement: 12859_2011_5122_MOESM8_ESM.pdf [file 12859_2011_5122_MOESM8_ESM.pdf]
